# Supplementary material for: 発達相談とつなぐこと : 乳幼児期~就学
Source: Springer Nature journal article supplement (doi:10.1007/s11523-023-00955-9), 2014-03-31

**Genomic Landscape of Primary Resistance to Osimertinib among Hispanic patients with *EGFR*-Mutant Non-Small Cell Lung Cancer (NSCLC): Results of an observational longitudinal cohort study**

Diego F. Chamorro<sup>1,2,†</sup>, Andrés F. Cardona<sup>3,4,†</sup>, July Rodríguez<sup>1,2,†</sup>, Alejandro Ruiz-Patiño<sup>1,2,†</sup>, Oscar Arrieta<sup>5,†</sup>, Darwin A. Moreno-Pérez<sup>1,2</sup>, Leonardo Rojas<sup>5</sup>, Zyanya Lucia Zatarain-Barrón<sup>5</sup>, Dora V. Ardila<sup>1,2</sup>, Lucia Viola<sup>6</sup>, Gonzalo Recondo<sup>7</sup>, Juan B. Blaquier<sup>7</sup>, Claudio Martín<sup>8</sup>, Luis Raez<sup>9</sup>, Suraj Samtani<sup>10</sup>, Camila Ordóñez-Reyes<sup>1,2</sup>, Juan Esteban Garcia-Robledo<sup>11</sup>, Luis Corrales<sup>12</sup>, Carolina Sotelo<sup>1,2</sup>, Luisa Ricaurte<sup>13</sup>, Mauricio Cuello<sup>14</sup>, Sergio Mejía<sup>15</sup>, Elvira Jaller<sup>1,2</sup>, Carlos Vargas<sup>1,2</sup>, Hernán Carranza<sup>1,2</sup>, Jorge Otero<sup>1,2</sup>, Pilar Archila<sup>1,2</sup>, Maritza Bermudez<sup>1,2</sup>, Tatiana Gamez<sup>1,2</sup>, Alessandro Russo<sup>16</sup>, Umberto Malapelle<sup>17</sup>, Diego de Miguel Perez<sup>18</sup>, Vladmir C. Cordeiro de Lima<sup>19</sup>, Helano Freitas<sup>19</sup>, Erick Saldahna<sup>19</sup>, Christian Rolfo<sup>18</sup>, Rafael Rosell<sup>20</sup>; on behalf of *CLICaP*<sup>†</sup>

<sup>1</sup>Foundation for Clinical and Applied Cancer Research – FICMAC, Bogotá, Colombia

<sup>2</sup>Molecular Oncology and Biology Systems Research Group (Fox-G), Universidad el Bosque, Bogotá, Colombia

<sup>3</sup>Direction of Research, Science, and Education, Luis Carlos Sarmiento Angulo Cancer Treatment and Research Center (CTIC), Bogotá, Colombia

<sup>4</sup>Thoracic Oncology Unit, Luis Carlos Sarmiento Angulo Cancer Treatment and Research Center (CTIC), Bogotá, Colombia

<sup>5</sup>Thoracic Oncology Unit and Personalized Oncology Laboratory, National Cancer Institute (INCan), México City, México

<sup>6</sup>Thoracic Oncology Unit, Fundación Neumológica Colombiana – FNC, Bogotá, Colombia

<sup>7</sup>Thoracic Oncology Unit, Centro de Educación Médica e Investigaciones Clínicas (CEMIC), Buenos Aires, Argentina

<sup>8</sup>Thoracic Oncology Unit, Alexander Fleming Institute, Buenos Aires, Argentina

<sup>9</sup>Thoracic Oncology Program, Memorial Cancer Institute, Florida Atlantic University (FAU), Miami, Florida, US

<sup>10</sup>Medical Oncology Department, Bradford Hill Institute, Santiago, Chile

<sup>11</sup>Division of Hematology/Oncology, Mayo Clinic, Scottsdale, United States

<sup>12</sup>Thoracic Oncology Unit, Centro de Investigación y Manejo del Cáncer – CIMCA, San José, Costa Rica

<sup>13</sup>Pathology Department, Mayo Clinic, Rochester, Minnesota, United States

<sup>14</sup>Medical Oncology Department, Hospital de Clínicas, Universidad de la República – UdeLAR, Montevideo, Uruguay

<sup>15</sup>Toracic Oncology Unit, Oncology Department, Cancer Institute, Clínica de las Américas, Medellín, Colombia

<sup>16</sup>Medical Oncology Department, Azienda Ospedaliera Papardo, Messina, Sicilia, Italy

<sup>17</sup>Predictive Molecular Pathology Laboratory, Department of Public Health, University Federico II of Naples, Naples, Italy

<sup>18</sup>Thoracic Oncology Center, Tisch Cáncer Center, Mount Sinai Hospital System & Icahn School of Medicine, Mount Sinai, New York, NY, USA

<sup>19</sup> Thoracic Oncology Unit, A.C. Camargo Cancer Center, Sao Paulo, Brazil

<sup>20</sup>Cancer Biology and Precision Medicine Program, Germans Trias i Pujol Research Institute (IGTP) / Dr. Rosell Oncology Institute (IOR) Quirón-Dexeus University Institute, Barcelona, Spain

<sup>¶</sup>These authors contributed equally to the study.

<sup>‡</sup>Latin American Consortium for the Investigation of Lung Cancer

**\*Correspondence:** Andrés F. Cardona, MD MSc PhD MBA.

Direction of Research, Science, and Education, Luis Carlos Sarmiento Angulo Cancer Treatment and Research Center (CTIC), Bogotá, Colombia

Address: Calle 168 # 14, 110221

Phone: +57 6190052

e-mail: [acardona@fctic.org](mailto:acardona@fctic.org)

Twitter: [@AndresFCardonaZ](https://twitter.com/AndresFCardonaZ)

## Supplementary material

**Supplementary Data 1.** Density analysis refers to the homogeneity of the samples in the sequencing chip; for this assembly, the Ion 540™ chip was used. As can be seen in the graph, there are different percentages of homogeneity represented in colors. The lowest rate is represented by the color blue (0 to 10%) and the highest by the color red (90 to 100%).

### JSP Density

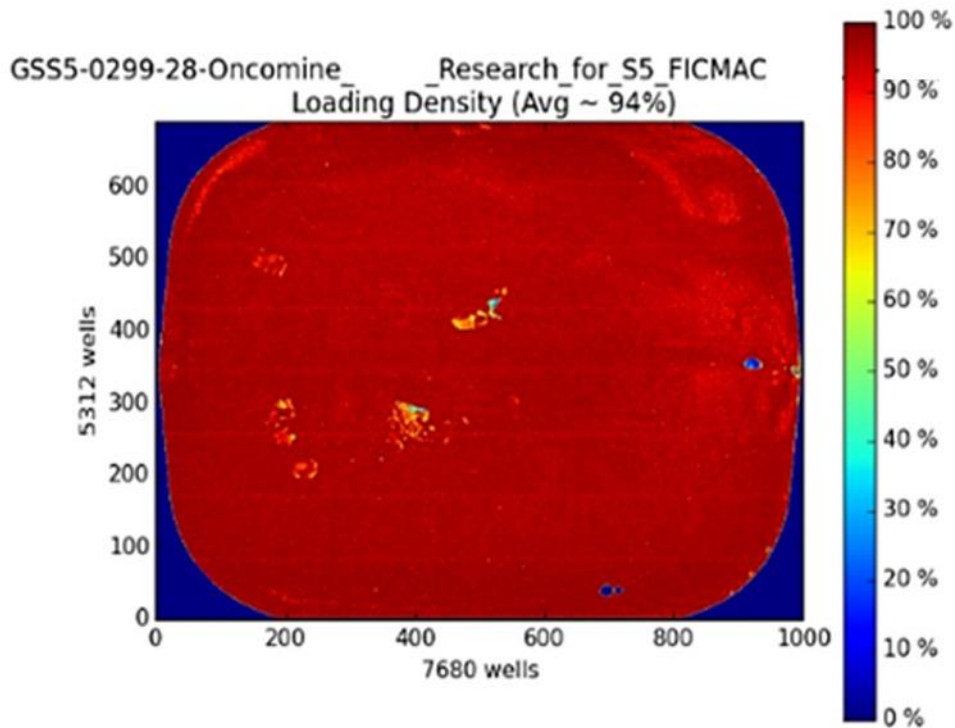

**Supplementary Data 2.** In the SD3A, it is observed that the run density was 93%, so the quality metric was adequate for the analysis. In SD3B, the percentage of usable sequences was 41%. Additionally, 82% was obtained for the final library. In the SD3C graph, it is evident that the length of most of the read fragments was between 100 and 150 bp with a mean of 112 bp (data analysis carried out using the S5 torrent server). With the results obtained, it was possible to conclude that, although the integrity of the DNA was moderate, the use of the UDG enzyme and the purification of DNA fragments helped considerably to obtain better quality metrics.

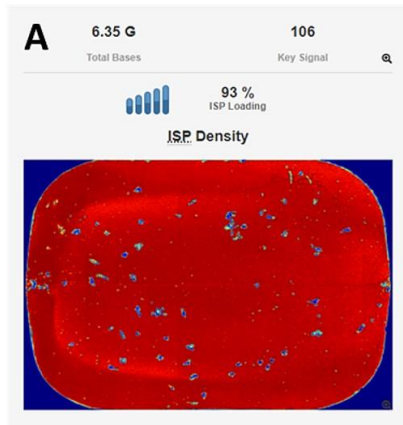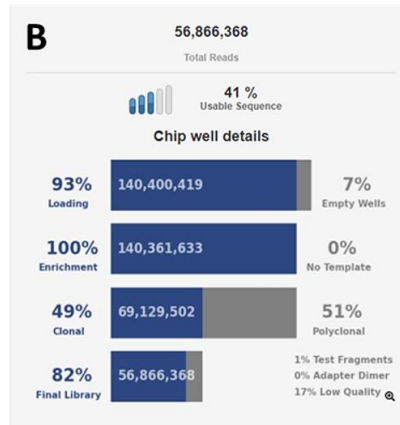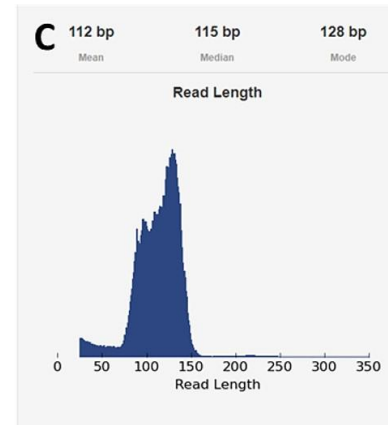

**Supplementary Table 1.** Genes and alterations included in the analysis.

| <b>Hotspot and CNVs</b> | <b>Full-Coding DNA Sequence (CDS)</b> | <b>RNA Fusions</b> |
|-------------------------|---------------------------------------|--------------------|
| A1CF                    | ABRAXAS1                              | AKT2               |
| ABCB1                   | ACVR1B                                | ALK                |
| ABL1                    | ACVR2A                                | AR                 |
| ABL2                    | ADAMTS2                               | AXL                |
| ACVR1                   | ADAMTS12                              | BRAF               |
| AKT1                    | AMER1                                 | BRCA1              |
| AKT2                    | APC                                   | BRCA2              |
| AKT3                    | ARHGAP35                              | CDKN2A             |
| ALK                     | ARID1A                                | EGFR               |
| AR                      | ARID1B                                | ERB84              |
| ARAF                    | ARID2                                 | ERBB2              |
| ATP1A1                  | ARID5B                                | ERG                |
| AURKA                   | ASXL1                                 | ESR1               |
| AURKB                   | ASXL2                                 | ETV1               |
| AURKC                   | ATM                                   | ETV4               |
| AXL                     | ATR                                   | ETV5               |
| BCL2                    | ATRX                                  | FGFR1              |
| BCL2L12                 | AXIN1                                 | FGFR2              |
| BCL6                    | AXIN2                                 | FGFR3              |
| BMP5                    | B2M                                   | FGR                |
| BRAF                    | BAP1                                  | FLT3               |
| BTK                     | BARD1                                 | JAK2               |
| CACNA1D                 | BCOR                                  | KRAS               |
| CARD11                  | BLM                                   | MDM4               |
| CBL                     | BMPR2                                 | MET                |
| CCND1                   | BRCA1                                 | MYB                |
| CCND2                   | BRCA2                                 | MYBL1              |
| CCND3                   | BRIP1                                 | NF1                |
| CCNE1                   | CASP8                                 | NOTCH1             |
| CD79B                   | CBFB                                  |                    |
| CDK4                    | CD274                                 |                    |
| CDK6                    | CD276                                 |                    |

|         |        |  |
|---------|--------|--|
| CHD4    | CDC73  |  |
| CSF1R   | CDH1   |  |
| CSMD3   | CDH10  |  |
| CTNNB1  | CDK12  |  |
| CTNND2  | CDKN1A |  |
| CUL1    | CDKN1B |  |
| CYSLTR2 | CDKN2A |  |
| DDR1    | CDKN2B |  |
| DDR2    | CDKN2C |  |
| DGCR8   | CHEK1  |  |
| DROSHA  | CHEK2  |  |
| E2F1    | CIITA  |  |
| EGFR    | CIC    |  |
| EIF1AX  | CREBBP |  |
| EMSY    | CSMD3  |  |
| EPAS1   | CTCF   |  |
| ERBB2   | CTLA4  |  |
| ERBB3   | CUL3   |  |
| ERBB4   | CUL4A  |  |
| ESR1    | CUL4B  |  |
| EZH2    | CYLD   |  |
| FAM135B | CYP2C9 |  |
| FGF19   | CYP2D6 |  |
| FGF23   | DAXX   |  |
| FGF3    | DDX3X  |  |
| FGF4    | DICER1 |  |
| FGF7    | DNMT3A |  |
| FGF9    | DOCK3  |  |
| FGFR1   | DPYD   |  |
| FGFR2   | DSC1   |  |
| FGFR3   | DSC3   |  |
| FGFR4   | ELF3   |  |
| FLT3    | ENO1   |  |
| FLT4    | EP300  |  |
| FOXA1   | EPCAM  |  |
| FOXL2   | EPHA2  |  |

|           |        |  |
|-----------|--------|--|
| FOXO1     | ERAP1  |  |
| FYN       | ERAP2  |  |
| GATA2     | ERCC2  |  |
| GLI1      | ERCC4  |  |
| GLI3      | ERCC5  |  |
| GNA11     | ERRFI1 |  |
| GNAQ      | ETV6   |  |
| GNAS      | FANCA  |  |
| H3F3A     | FANCC  |  |
| H3F3B     | FANCD2 |  |
| HIF1A     | FANCE  |  |
| HIST1H1E  | FANCF  |  |
| HIST1H2BD | FANCG  |  |
| HIST1H3B  | FANCI  |  |
| HRAS      | FANCL  |  |
| IDH1      | FANCM  |  |
| IDH2      | FAT1   |  |
| IGF1R     | FBXW7  |  |
| IKBKB     | FUBP1  |  |
| IL6ST     | GATA3  |  |
| IL7R      | GNA13  |  |
| IRF4      | GPS2   |  |
| IRS4      | HDAC2  |  |
| KCNJ5     | HDAC9  |  |
| KDR       | HLA-A  |  |
| KIR3DL1   | HLA-B  |  |
| KIT       | HNF1A  |  |
| KLF4      | ID3    |  |
| KLF5      | INPP4B |  |
| KNSTRN    | JAK1   |  |
| KRAS      | JAK2   |  |
| MAGOH     | JAK3   |  |
| MAP2K1    | KDM5C  |  |
| MAP2K2    | KDM6A  |  |
| MAPK1     | KEAP1  |  |
| MAX       | KMT2A  |  |

|         |        |  |
|---------|--------|--|
| MCL1    | KMT2B  |  |
| MDM2    | KMT2C  |  |
| MDM4    | KMT2D  |  |
| MECOM   | LARP4B |  |
| MED12   | LATS1  |  |
| MEF2B   | LATS2  |  |
| MET     | MAP2K4 |  |
| MITF    | MAP2K7 |  |
| MPL     | MAP3K1 |  |
| MTOR    | MAP3K4 |  |
| MYC     | MAPK8  |  |
| MYCL    | MEN1   |  |
| MYCN    | MGA    |  |
| MYD88   | MLH1   |  |
| MYOD1   | MLH3   |  |
| NFE2L2  | MRE11  |  |
| NRAS    | MSH2   |  |
| NSD2    | MSH3   |  |
| NT5C2   | MSH6   |  |
| NTRK1   | MTAP   |  |
| NTRK2   | MTUS2  |  |
| NTRK3   | MUTYH  |  |
| NUP93   | NBN    |  |
| PAK5    | NCOR1  |  |
| PAX5    | NF1    |  |
| PCBP1   | NF2    |  |
| PDGFRA  | NOTCH1 |  |
| PDGFRB  | NOTCH2 |  |
| PIK3C2B | NOTCH3 |  |
| PIK3CA  | NOTCH4 |  |
| PIK3CB  | PALB2  |  |
| PIK3CD  | PARP1  |  |
| PIK3CG  | PARP2  |  |
| PIK3R2  | PARP3  |  |
| PIM1    | PARP4  |  |
| PLCG1   | PBRM1  |  |



|         |          |  |
|---------|----------|--|
| PPP2R1A | PDCD1    |  |
| PPP6C   | PDCD1LG2 |  |
| PRKACA  | PDIA3    |  |
| PTPN11  | PGD      |  |
| PTPRD   | PHF6     |  |
| PXDNL   | PIK3R1   |  |
| RAC1    | PMS1     |  |
| RAF1    | PMS2     |  |
| RARA    | POLD1    |  |
| RET     | POLE     |  |
| RGS7    | POT1     |  |
| RHEB    | PPM1D    |  |
| RHOA    | PPP2R2A  |  |
| RICTOR  | PRDM1    |  |
| RIT1    | PRDM9    |  |
| ROS1    | PRKAR1A  |  |
| RPL10   | PSMB9    |  |
| RPS6KB1 | PSMB10   |  |
| RPTOR   | PTCH1    |  |
| SETBP1  | PTEN     |  |
| SF3B1   | PTPRT    |  |
| SIX1    | RAD50    |  |
| SIX2    | RAD51    |  |
| SLCO1B3 | RAD51B   |  |
| SMC1A   | RAD51C   |  |
| SMO     | RAD51D   |  |
| SNCAIP  | RAD52    |  |
| SOS1    | RAD54L   |  |
| SOX2    | RASA1    |  |
| SPOP    | RASA2    |  |
| SRC     | RB1      |  |
| SRSF2   | RBM10    |  |
| STAT1   | RECQL4   |  |
| STAT3   | RNASEH2A |  |
| STAT5B  | RNASEH2B |  |
| STAT6   | RNASEH2C |  |

|        |         |  |
|--------|---------|--|
| TAF1   | RNF43   |  |
| TERT   | RPA1    |  |
| TGFBR1 | RPL22   |  |
| TOP1   | RPL5    |  |
| TPMT   | RUNX1   |  |
| TRRAP  | RUNX1T1 |  |
| TSHR   | SDHA    |  |
| U2AF1  | SDHB    |  |
| USP8   | SDHC    |  |
| WAS    | SDHD    |  |
| XPO1   | SETD2   |  |
| YAP1   | SLX4    |  |
| YES1   | SMAD2   |  |
| ZNF217 | SMAD4   |  |
| ZNF429 | SMARCA4 |  |
|        | SMARCB1 |  |
|        | SOCS1   |  |
|        | SOX9    |  |

**Supplementary Table 2.** Genetic variants detected at diagnosis and after progression to Osimertinib in Cohorts A and B.

| <b>Genomic alteration identified at diagnosis</b> |              |
|---------------------------------------------------|--------------|
| <b>Variant</b>                                    | <b>N (%)</b> |
| <b><i>TP53</i></b>                                | 22           |
| p.V173fs                                          | 3 (13.7)     |
| p.A159P                                           | 1 (4.5)      |
| p.C277F                                           | 1 (4.5)      |
| p.D281E                                           | 2 (9.2)      |
| p.D281V                                           | 1 (4.5)      |
| p.D281V                                           | 1 (4.5)      |
| p.E286G                                           | 1 (4.5)      |
| p.G245V                                           | 2 (9.2)      |
| p.R337L                                           | 1 (4.5)      |
| p.H168L                                           | 2 (9.2)      |
| p.R175H                                           | 1 (4.5)      |
| p.R280T                                           | 1 (4.5)      |
| p.T155I                                           | 2 (9.2)      |
| p.V272G                                           | 1 (4.5)      |
| p.Y205C                                           | 1 (4.5)      |
| p.Y220C                                           | 1 (4.5)      |
| <b><i>ARID1A</i></b>                              | 6            |
| p.E2032K                                          | 3 (50.2)     |
| p.Q1357L                                          | 1 (16.6)     |
| p.Q754*                                           | 1 (16.6)     |
| p.E1760*                                          | 1 (16.6)     |
| <b><i>SETD2</i></b>                               | 5            |
| p.F1651fs                                         | 3 (60.0)     |
| p.E1518*                                          | 1 (20.0)     |
| p.R1063*                                          | 1 (20.0)     |
| <b><i>BRAF</i></b>                                | 4            |
| Amp                                               | 3 (75.0)     |
| p.G466V                                           | 1 (25.0)     |
| <b><i>SMARCA4</i></b>                             | 3            |
| p.R381*                                           | 3 (100.0)    |
| <b><i>RBM10</i></b>                               | 3            |

|               |           |
|---------------|-----------|
| p.Q155*       | 1 (33.3)  |
| p.Q192_splice | 1 (33.3)  |
| p.E559*       | 1 (33.3)  |
| <b>CDKN2A</b> | 2         |
| p.V51 splice  | 1 (50.0)  |
| p.H83Y        | 1 (50.0)  |
| <b>FGFR2</b>  | 2         |
| p.S137W       | 1 (50.0)  |
| Amp           | 1 (50.0)  |
| <b>KRAS</b>   | 2         |
| Amp           | 2 (100.0) |
| <b>NOTCH1</b> | 2         |
| p.Q1584*      | 1 (50.0)  |
| p.Q2459*      | 1 (50.0)  |
| <b>PDGFR</b>  | 2         |
| Amp           | 2 (100.0) |
| <b>RB1</b>    | 2         |
| p.E398L       | 1 (50.0)  |
| p.Y756C       | 1 (50.0)  |
| <b>NRAS</b>   | 1         |
| p.A146T       | 1 (100.0) |
| <b>RB1</b>    | 1         |
| p.Y756C       | 1 (100.0) |
| <b>MGA</b>    | 1         |
| p.R702*       | 1 (100.0) |
| <b>NF1</b>    | 1         |
| p.Q1189*      | 1 (100.0) |
| <b>KIT</b>    | 1         |
| p.V556D       | 1 (100.0) |
| <b>TSC1</b>   | 1         |
| p.Q527*       | 1 (100.0) |
| <b>FANCA</b>  | 1         |
| p.E1196*      | 1 (100.0) |
| <b>FGFR3</b>  | 1         |
| p.R248C       | 1 (100.0) |
| <b>SMAD4</b>  | 1         |

|                                                                                |              |
|--------------------------------------------------------------------------------|--------------|
| p.R361                                                                         | 1 (100.0)    |
| <b>U2AF1</b>                                                                   | 1            |
| p.S34F                                                                         | 1 (100.0)    |
| <b>AKT1</b>                                                                    | 1            |
| p.D323Y                                                                        | 1 (100.0)    |
| <b>DMNT3A</b>                                                                  | 1            |
| p.W314*                                                                        | 1 (100.0)    |
| <b>KEAP1</b>                                                                   | 1            |
| p.D479G                                                                        | 1 (100.0)    |
| <b>MTOR</b>                                                                    | 1            |
| p.E2014K                                                                       | 1 (100.0)    |
| <b>Genomic alteration identified at the time of progression to Osimertinib</b> |              |
| <b>Variant</b>                                                                 | <b>N (%)</b> |
| <b>TP53</b>                                                                    | 16           |
| p.E286G                                                                        | 1 (6.2)      |
| p.G245V                                                                        | 2 (12.6)     |
| p.R337                                                                         | 1 (6.2)      |
| p.H168L                                                                        | 1 (6.2)      |
| p.R175H                                                                        | 1 (6.2)      |
| p.R280T                                                                        | 1 (6.2)      |
| p.T155I                                                                        | 2 (12.6)     |
| p.V173fs                                                                       | 2 (12.6)     |
| p.Y205C                                                                        | 1 (6.2)      |
| p.A159P                                                                        | 1 (6.2)      |
| p.C277                                                                         | 1 (6.2)      |
| p.Q192*                                                                        | 1 (6.2)      |
| p.G245S                                                                        | 1 (6.2)      |
| <b>BRAF</b>                                                                    | 8            |
| Amp                                                                            | 6 (75.0)     |
| p.G466V                                                                        | 2 (25.0)     |
| <b>EGFR</b>                                                                    | 7            |
| Amp                                                                            | 5 (71.5)     |
| p.C719S                                                                        | 2 (28.5)     |
| <b>KRAS</b>                                                                    | 7            |
| Amp                                                                            | 2 (28.6)     |

|               |           |
|---------------|-----------|
| p.G12C        | 2 (28.6)  |
| p.G12D        | 3 (42.8)  |
| <b>MET</b>    | 5         |
| Amp           | 5 (100.0) |
| <b>RB1</b>    | 5         |
| p.Y756C       | 4 (80.0)  |
| p.E398L       | 1 (20.0)  |
| <b>NF1</b>    | 3         |
| p.Q1189*      | 2 (66.6)  |
| p.E2357*      | 1 (33.3)  |
| <b>PI3K</b>   | 3         |
| p.E545K       | 1 (33.3)  |
| p.Q546K       | 2 (66.6)  |
| <b>NRAS</b>   | 2         |
| p.A146T       | 1 (50.0)  |
| p.Q61L        | 1 (50.0)  |
| <b>GNAS</b>   | 2         |
| p.R201S       | 1 (50.0)  |
| p.R205T       | 1 (50.0)  |
| <b>HER2</b>   | 1         |
| Amp           | 1 (100.0) |
| <b>SETD2</b>  | 1         |
| p.E1518*      | 1 (100.0) |
| <b>ARID1A</b> | 1         |
| p.Q754*       | 1 (100.0) |
| <b>CTNNB1</b> | 1         |
| p.G34R        | 1 (100.0) |
| <b>MTOR</b>   | 1         |
| p.E2014K      | 1 (100.0) |
| <b>PDGFRa</b> | 1         |
| Amp           | 1 (100.0) |
| <b>RT1</b>    | 1         |
| p.M90I        | 1 (100.0) |

**Supplementary Figure 1.** Distribution of mRNA levels for *AXL* and *BIM* in Cohorts A and B.

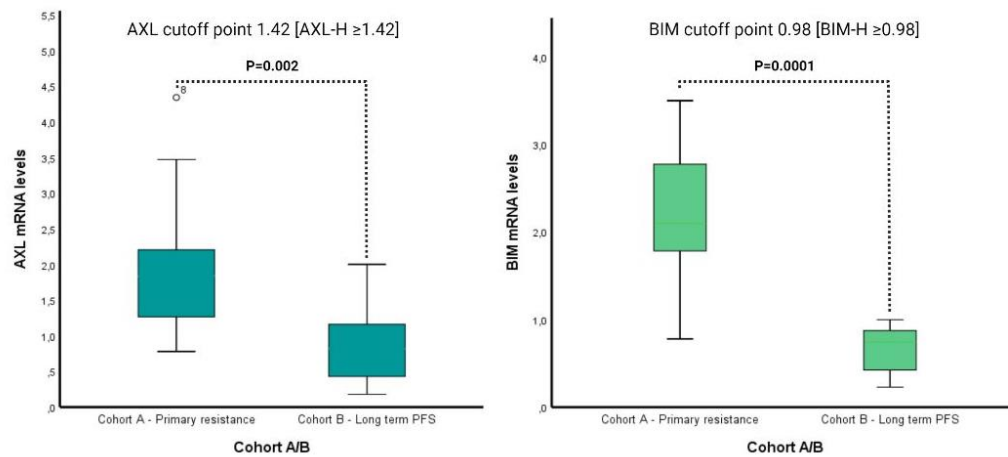

**Supplementary Figure 2.** Detection of *EGFR* cDNA by droplet digital PCR *EGFR* multiplex assays performed at week 8 after starting treatment with Osimertinib.

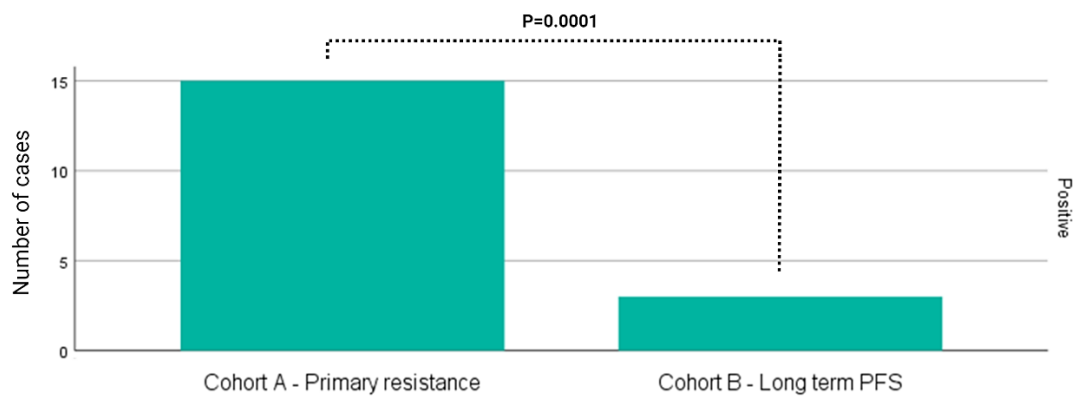

**Supplementary Figure 3. (A)** PFS for Osimertinib according to the type of sensitizing mutation. As mentioned, patients in cohort A had a higher number of alterations in exon 21 compared with those in cohort B. **(B)** OS discriminated by the type of mutation in *EGFR* (immature data for the calculation of medians).

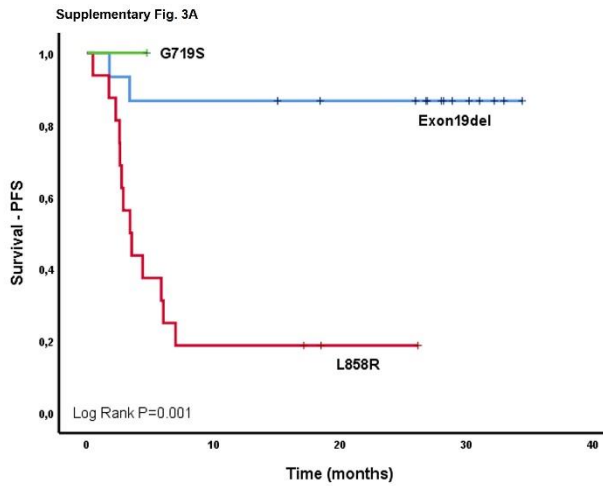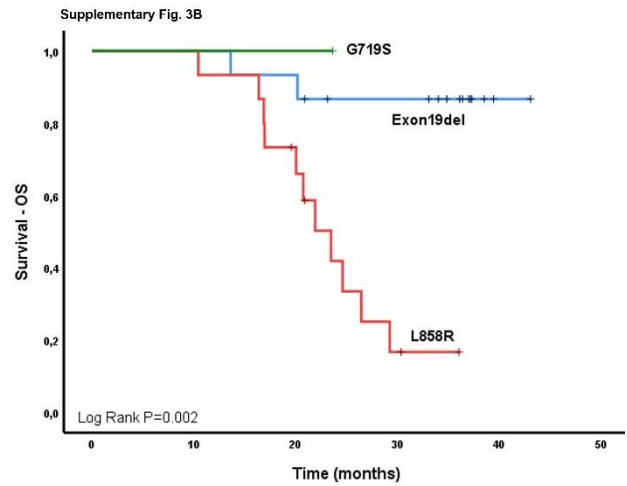

**Supplementary Figure 4. (A)** PFS for Osimertinib according to presence of brain metastases at the time of diagnosis. **(B)** OS in patients with and without brain metastases at diagnosis was 21.0 months (95%CI 19.4-24.3) and 35.0 months (95%CI 31.0-40.2), respectively (P=0.013).

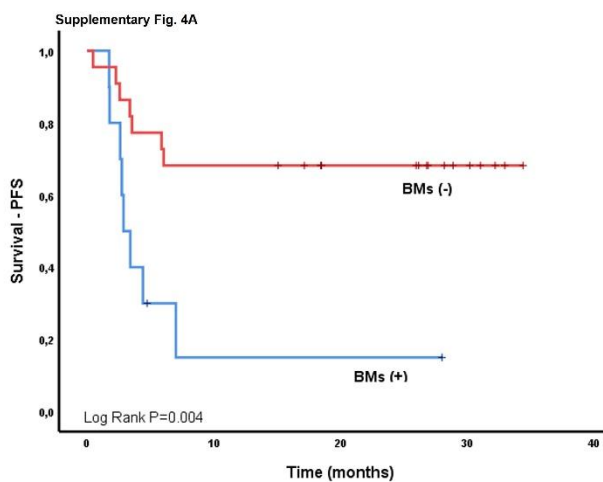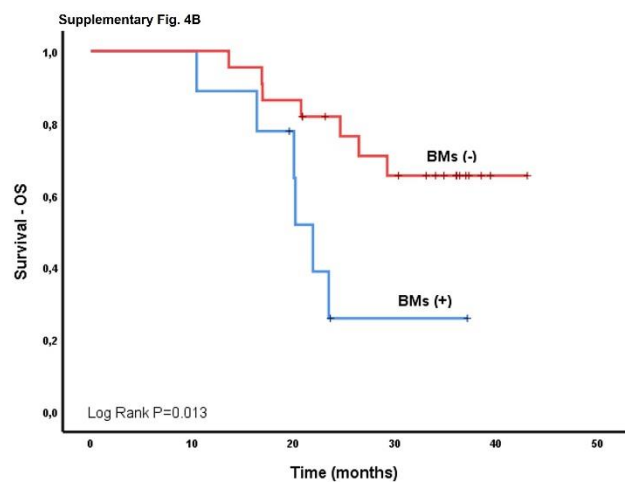



**Supplementary Figure 5. (A)** PFS for Osimertinib according to the presence of T790M mutation at baseline, a finding that was dominant in Cohort A. The PFS for Osimertinib in those with baseline T790M was 8.4 months (95%CI 1.7-5.0) versus 21.6 months (95 %CI 15.8-27.4; P=0.041) among those without T790M mutation. **(B)** OS according to the presence (21.1 months, 95%CI 10.9-31.2) or absence (34.2 months, 95%CI 29.8-38.5) of the baseline T790M mutation (P=0.06).

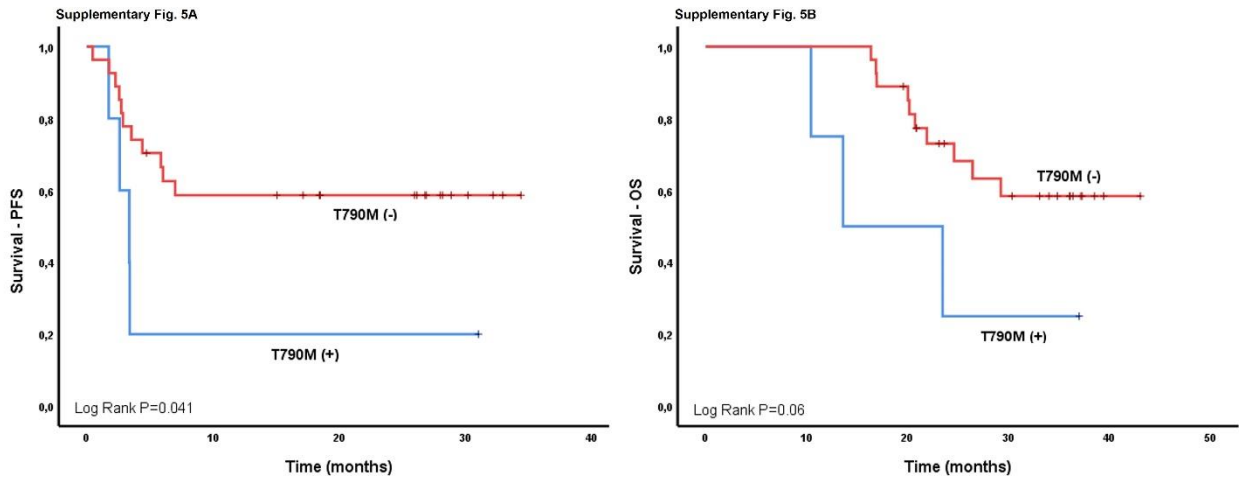

**Supplementary Figure 6. (A)** PFS for Osimertinib according to the number of co-mutations. Those with  $\leq 2$  co-mutations had a PFS of 30.8 months (95% CI 26-2-35.4) versus the group with  $\geq 3$  co-mutations (3.3 months, 95% CI 2.3-4.3; P=0.0001). **(B)** OS discriminated for patients with  $\leq 2$  co-mutations (40.3 months, 95%CI 36.7-43.9) and  $\geq 3$  co-mutations (21.1 months, 95%CI 17.9-24.2; P=0.0001).

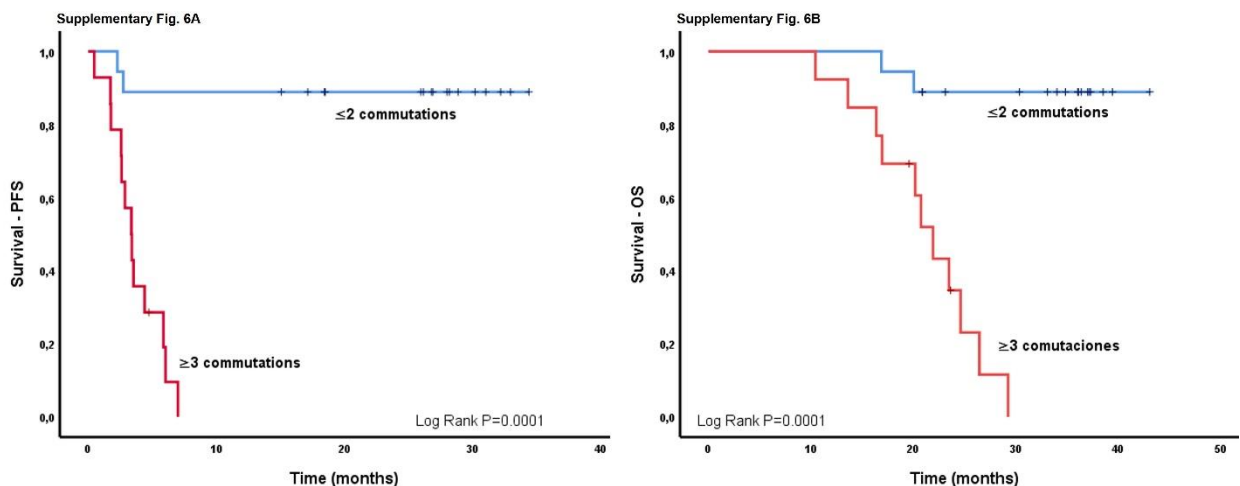

**Supplementary Figure 7. (A)** PFS for Osimertinib according to TMB. Patients with TMB-H had a PFS of 2.7 months (95%CI 2.3-3.0) versus 19.2 months (95%CI 12.0-25.5) for those with TMB-L ( $P=0.017$ ). **(B)** The median OS according to TMB was 33.3 months (95%CI 28.7-38.9) for those with TMB-L and 18.8 months (95%CI 17.0-20.6) for those with TMB-H ( $P=0.0001$ ).

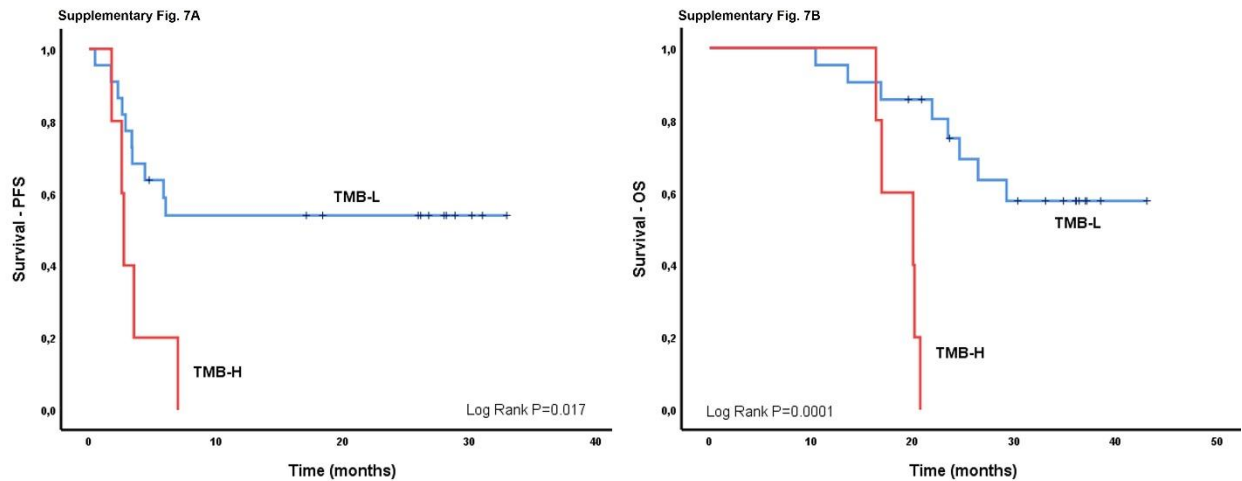

**Supplementary Figure 8. (A)** According to mRNA expression for *AXL*, OS is 40.1 months (95%CI 36.4-43.8) for patients with *AXL*-L and 24.4 months (95%CI 19.6-29.3;  $P=0.001$ ) for those in the *AXL*-H group. **(B)** According to *BIM* mRNA expression, OS was 40.8 months (95%CI 36.7-45.0) for the *BIM*-H group and 22.4 months for the *BIM*-L (95%CI 19.9-24.9;  $P=0.0001$ ). **(C)** OS for patients with (24.0 months, 95%CI 20.1-28.0) and without (41.4 months, 95%CI 38.3-44.5) detectable cfDNA at week eight after starting Osimertinib ( $P=0.001$ ).

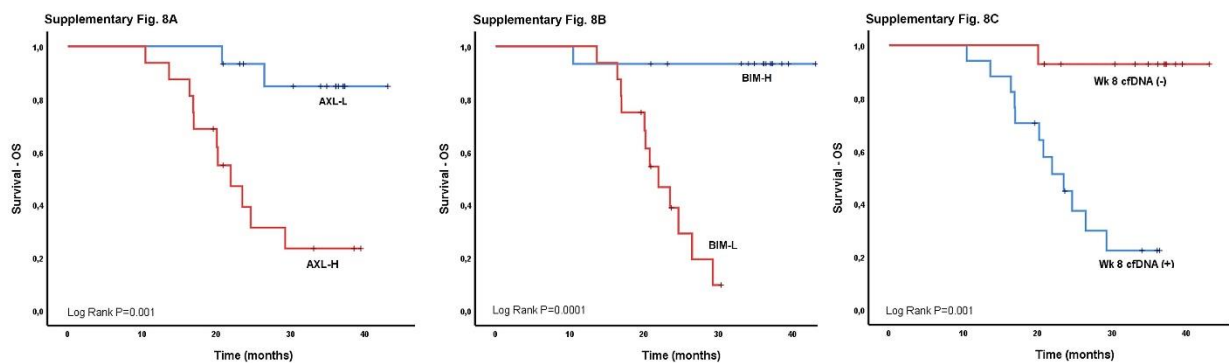

**Supplementary Figure 9.** Representative case (case No. 13 of Cohort A) of primary resistance to osimertinib, including genomic variations throughout the history of the disease

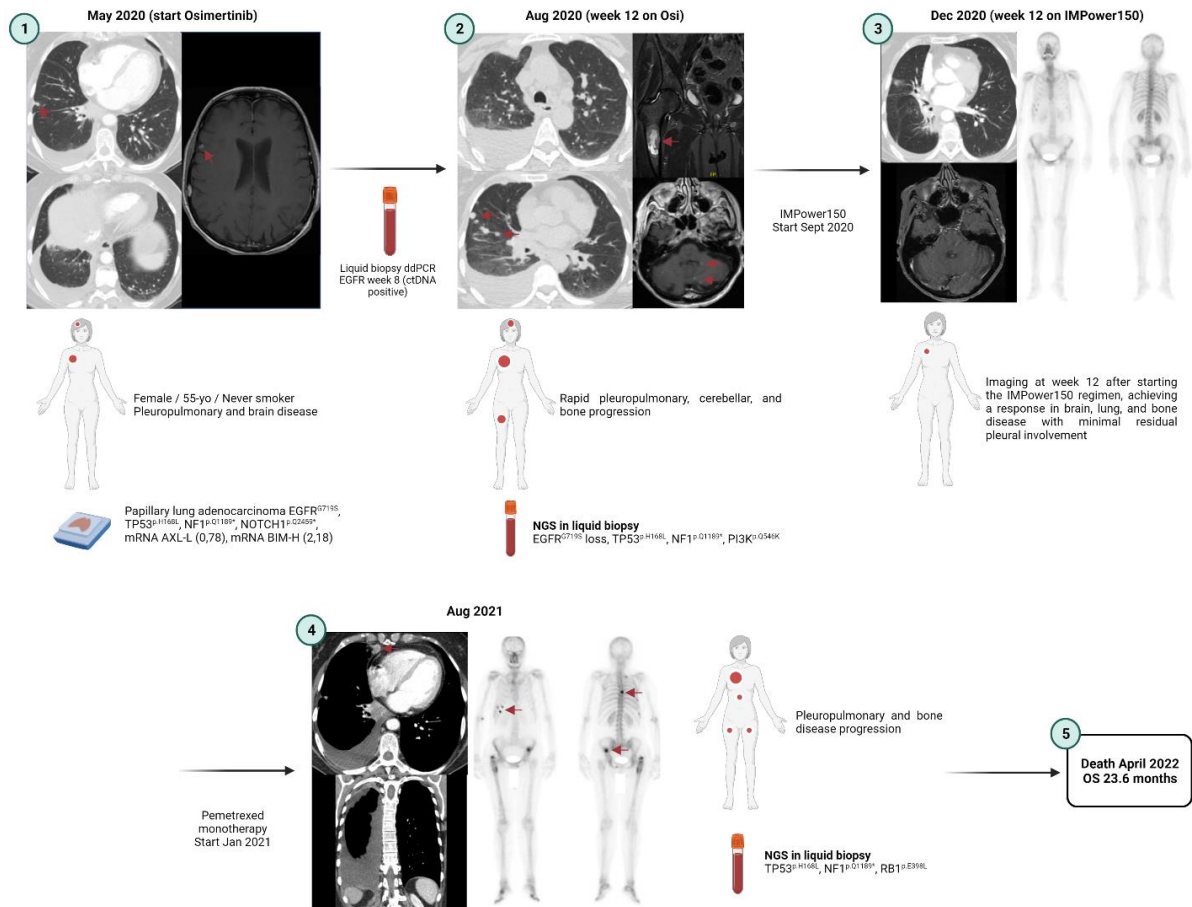

Supplement: MOESM1 [file 25211688]
